# Supplementary material for: Lower blood pressure and risk of cisplatin nephrotoxicity: a retrospective cohort study
Source: BMC Cancer. 2017 Feb 20;17:144. doi: 10.1186/s12885-017-3135-6 (PMC5319111; doi:10.1186/s12885-017-3135-6)
Supplement: Additional file 1: — Original data of 442 cycles of cisplatin chemotherapy in 182 patients. (XLSX 88 kb) [file 12885_2017_3135_MOESM1_ESM.xlsx]

## Sheet: Sheet1
ID	cycle number	cancer type	smoker	alcohol	HT	DM	CVD	dose	age range	BMI	BSA	dose/BSA	Cumulative dose/BSA	Combination of anticancer drugs	food form	food intake (> 50%)	sBP	dBP	sBP Quartile	antihypertensive medication	CCB	ARB/ACE-I	other	Diuretics type	Diuretics	Cr	HGB	ALB	CRP	Cr max	Cr>*1.5
1	1	1	0	0	1	0	0	123.36	60-69	24.619	1.57874	78.1382	78.1382	1	2	1	127	75	3	1	1	0	0	2	1	0.54	13.3	4	0.04	0.75	0
1	2	1	0	0	1	0	0	241.36	60-69	22.6263	1.52311	77.4731	155.611	1	2	1	146	81	4	1	1	0	0	2	1	0.66	12.3	4.1	0.02	0.81	0
2	1	2	1	0	1	1	0	144.24	50-59	29.8328	1.82916	78.8557	78.8557	1	2	0	122	72	3	1	1	0	0	2	1	0.93	15	3.9	0.33	1.54	1
2	2	2	1	0	1	1	0	213.24	50-59	27.3499	1.76284	39.1413	117.997	0	2	1	107	52	2	1	1	0	0	2	1	1.12	10.9	3.7	1.16	1.3	0
2	3	2	1	0	1	1	0	281.56	50-59	26.6623	1.74387	39.1772	157.174	0	2	1	118	72	3	1	1	0	0	2	1	1.3	10.8	3.7	3.57	6.87	1
3	1	2	1	0	0	0	0	115.2	50-59	21.4074	1.47713	77.9891	77.9891	1	1	1	113	83	2	0	0	0	0	2	1	0.6	13.6	4.4	0.11	0.65	0
3	2	2	1	0	0	0	0	227.52	50-59	19.5222	1.42038	79.0776	157.067	1	1	0	110	52	2	0	0	0	0	2	1	0.6	11.9	4.7	0.21	0.74	0
3	3	2	1	0	0	0	0	336.64	50-59	18.9148	1.40142	77.8638	234.931	1	2	1	112	70	2	0	0	0	0	2	1	0.52	11.4	4.5	0.06	0.76	0
3	4	2	1	0	0	0	0	445.28	50-59	18.7681	1.39679	77.7781	312.709	1	2	1	112	70	2	0	0	0	0	2	1	0.57	10.4	4.5	0.02	0.98	1
3	5	2	1	0	0	0	0	524.48	50-59	18.1981	1.35758	58.3389	371.048	1	1	1	99	70	1	0	0	0	0	2	1	0.7	11.5	4.6	0.08	0.82	0
3	6	2	1	0	0	0	0	603.14	50-59	17.5573	1.33706	58.8306	429.878	1	1	1	109	77	2	0	0	0	0	2	1	0.73	9.3	4.3	0.06	0.77	0
3	7	2	1	0	0	0	0	680.96	50-59	17.7069	1.34189	57.993	487.871	1	1	0	94	64	1	0	0	0	0	2	1	0.63	9.9	4.2	0.04	0.7	0
3	8	2	1	0	0	0	0	757.94	50-59	17.301	1.32873	57.9351	545.806	1	1	1	113	77	2	0	0	0	0	2	1	0.64	9.9	4.6	0.02	0.71	0
4	1	2	1	1	0	0	0	166.94	70-79	22.2948	1.72285	63.8151	63.8151	0	1	1	115	58	2	0	0	0	0	2	1	0.85	16	4	0.1	1.03	0
4	2	2	1	1	0	0	0	193.87	70-79	21.9778	1.7124	38.9395	102.755	0	1	1	103	59	1	0	0	0	0	2	1	0.8	15	3.7	0.31	0.96	0
5	1	2	1	1	0	0	0	135.44	70-79	22.3847	1.73872	77.8963	77.8963	0	2	1	114	68	2	0	0	0	0	2	1	0.63	11.7	3.6	1	0.6	0
5	2	2	1	1	0	0	1	268.96	70-79	21.4392	1.70712	78.2135	156.11	0	2	1	108	67	2	0	0	0	0	2	1	0.59	11.7	3.9	0.11	0.64	0
6	1	1	1	0	1	1	0	130	70-79	22.5255	1.67573	77.578	77.578	1	1	1	160	82	4	0	0	0	0	2	1	0.98	12.4	4.5	0.18	1.02	0
6	2	1	1	0	1	1	0	260	70-79	22.5255	1.67573	77.578	155.156	1	1	1	154	78	4	1	1	0	0	2	1	0.87	11.7	4.3	0.14	0.84	0
7	1	1	1	0	1	0	0	118.4	60-69	16.5382	1.51605	78.0978	78.0978	1	1	0	98	69	1	1	1	1	0	2	1	0.46	13.2	3.3	1.13	0.74	1
7	2	1	1	0	1	0	0	236.8	60-69	16.4324	1.51192	78.3111	156.409	1	2	1	104	72	1	1	1	1	0	2	1	0.69	12.6	3	0.58	0.76	0
7	3	1	1	0	1	0	0	355.2	60-69	18.424	1.58131	74.8746	231.284	1	1	1	137	91	4	1	1	1	0	2	1	0.52	11.9	3	5.15	1.02	1
7	4	1	1	0	1	0	0	465.2	60-69	15.2729	1.4533	75.6897	306.973	1	2	0	111	76	2	1	1	1	0	2	1	1.02	12.1	2.8	2.93	1.22	0
8	1	1	1	1	0	1	0	118.8	60-69	15.9287	1.53553	77.3672	77.3672	1	1	1	108	72	2	0	0	0	0	2	1	0.54	13.4	3.9	0.77	0.88	1
8	2	1	1	1	0	1	0	237.6	60-69	15.9287	1.53553	77.3672	154.734	1	1	1	102	64	1	0	0	0	0	2	1	0.73	12.7	4.2	0.14	0.82	0
8	3	1	1	1	0	1	0	337.63	60-69	14.6028	1.47985	67.5948	222.329	1	2	1	101	69	1	0	0	0	0	2	1	0.54	9.7	3.7	2.77	1.01	1
8	4	1	1	1	0	1	0	437.66	60-69	14.6028	1.47985	67.5948	289.924	1	2	1	96	66	1	0	0	0	0	2	1	0.94	9.6	3.6	2.48	1.44	1
8	5	1	1	1	0	1	0	517.66	60-69	12.9651	1.40302	57.0198	346.944	1	1	1	136	105	4	0	0	0	0	2	1	0.93	10.4	3.6	3	0.94	0
9	1	2	1	1	0	0	0	117.44	60-69	18.2183	1.51517	77.5094	77.5094	0	2	1	129	77	4	0	0	0	0	2	1	0.56	13	3.5	0.1	0.75	0
9	2	2	1	1	0	0	0	233.36	60-69	18.5901	1.52824	75.8522	153.362	0	2	1	123	76	3	0	0	0	0	2	1	0.59	11.4	3.5	0.52	0.74	0
10	1	1	1	0	1	1	0	140	70-79	26.8622	1.82493	76.7154	76.7154	1	1	1	127	66	3	1	0	1	0	2	1	0.92	15.8	4.4	0.07	2	1
10	2	1	1	0	1	1	0	280	70-79	26.1884	1.81046	77.3283	154.044	1	1	1	116	54	2	1	0	1	0	2	1	0.99	13.6	4.2	0.07	1.23	0
11	1	1	1	1	0	0	0	97.15	60-69	20.1161	1.56066	62.2506	62.2506	1	2	1	140	91	4	0	0	0	0	2	1	0.8	12.9	4.2	1.1	0.87	0
11	2	1	1	1	0	0	0	180.03	60-69	19.0017	1.52331	21.5846	83.8352	1	2	1	136	86	4	0	0	0	0	2	1	0.74	11.8	3.5	0.41	0.69	0
12	1	2	1	1	0	0	0	105.53	60-69	15.1142	1.43329	73.6246	73.6246	1	1	1	104	65	1	0	0	0	0	2	1	0.58	14	3.9	0.15	0.83	0
12	2	2	1	1	0	0	0	214.33	60-69	15.0421	1.43037	76.064	149.689	0	1	1	107	67	2	0	0	0	0	2	1	0.67	12.8	3.6	0.04	0.77	0
12	3	2	1	1	0	0	0	293.83	60-69	13.6713	1.37345	57.8834	207.572	0	2	0	99	67	1	0	0	0	0	3	1	0.74	11.9	3.7	0.34	1.71	1
13	1	2	1	1	1	0	0	115.36	60-69	19.8337	1.47394	78.2664	78.2664	0	1	1	125	79	3	1	1	0	0	2	1	0.87	13.5	3.9	0.14	0.89	0
13	2	2	1	1	1	0	0	228.24	60-69	18.9468	1.44556	78.0873	156.354	0	2	1	130	76	4	1	1	0	0	2	1	0.89	12.3	3.6	1.75	0.88	0
14	1	2	1	0	0	0	0	111.42	70-79	24.5348	1.781	62.5626	62.5626	0	1	1	110	56	2	0	0	0	0	2	1	0.82	14.5	4.2	0.05	0.85	0
14	2	2	1	0	0	0	0	222.59	70-79	24.3926	1.7766	62.5733	125.136	0	1	1	122	66	3	0	0	0	0	3	1	0.83	13.1	4	0.02	0.9	0
15	1	1	1	1	0	0	0	125	70-79	25.0259	1.88627	66.2682	66.2682	1	1	1	114	69	2	0	0	0	0	2	1	0.8	14.7	3.9	0.1	0.93	0
15	2	1	1	1	0	0	0	250	70-79	24.2574	1.86143	67.1525	133.421	1	2	1	134	60	4	0	0	0	0	2	1	0.86	12.5	3.6	2.92	1.04	0
15	3	1	1	1	0	0	0	375	70-79	23.8605	1.84002	67.9339	201.355	1	1	1	128	82	4	0	0	0	0	2	1	0.87	12.7	4.1	0.19	0.96	0
16	1	1	0	0	1	0	0	80	60-69	22.7778	1.44761	55.2634	55.2634	1	1	1	98	64	1	1	0	1	1	0	0	0.58	10.9	4	0.07	0.59	0
16	2	1	0	0	1	0	0	160	60-69	22.8321	1.42632	56.0883	111.352	1	1	1	138	88	4	1	0	1	1	0	0	0.63	10.8	4.1	0.07	0.69	0
17	1	2	1	1	0	0	0	106.8	50-59	18.1238	1.3734	77.763	77.763	0	2	1	106	72	1	0	0	0	0	2	1	0.33	12.7	4.3	0.17	0.52	1
17	2	2	1	1	0	0	0	211.36	50-59	17.2838	1.34598	77.6831	155.446	0	2	1	85	53	1	0	0	0	0	2	1	0.38	11.8	3.7	0.45	0.57	1
18	1	1	1	1	1	0	0	114.72	60-69	18.5413	1.48859	77.0664	77.0664	1	2	1	98	64	1	1	1	0	0	2	1	0.69	16.6	4.2	1.46	0.81	0
18	2	1	1	1	1	0	0	211.72	60-69	17.8448	1.42757	67.9475	145.014	1	2	1	113	68	2	0	0	0	0	2	1	0.64	13.4	3.7	0.23	0.81	0
18	3	1	1	1	1	0	0	291.72	60-69	17.0913	1.40164	57.0761	202.09	1	2	1	90	62	1	0	0	0	0	2	1	0.81	11.7	3.3	1.48	0.92	0
18	4	1	1	1	1	0	0	371.72	60-69	16.5189	1.40348	57.0014	259.091	1	2	1	106	61	1	0	0	0	0	2	1	0.7	12.7	3.8	0.1	0.97	0
18	5	1	1	1	1	0	0	451.72	60-69	16.5189	1.40348	57.0014	316.093	1	2	1	94	56	1	0	0	0	0	2	1	0.53	10.6	3.4	0.37	0.9	1
19	1	1	1	0	0	0	0	130	50-59	19.2816	1.71924	75.6147	75.6147	1	1	1	106	57	1	0	0	0	0	2	1	0.5	13.7	4.1	0.59	1.04	1
19	2	1	1	0	0	0	0	260	50-59	19.8367	1.74011	74.708	150.323	1	1	1	116	74	2	0	0	0	0	2	1	0.82	13.3	3.8	0.63	0.83	0
20	1	1	1	0	0	0	0	110	60-69	17.6959	1.41686	77.6365	77.6365	1	2	1	104	74	1	0	0	0	0	2	1	0.79	12.9	4	0.01	0.8	0
20	2	1	1	0	0	0	0	220	60-69	17.6959	1.41686	77.6365	155.273	1	2	1	104	74	1	0	0	0	0	2	1	0.8	13.5	4.4	0.01	0.84	0
20	3	1	1	0	0	0	0	310.58	60-69	15.622	1.33574	67.8125	223.086	1	1	1	103	64	1	0	0	0	0	2	1	0.76	12.9	4.1	0.02	1.18	1
21	1	1	1	1	1	0	1	125.86	70-79	28.9538	1.83604	68.5498	68.5498	1	1	1	120	65	3	0	0	0	0	2	1	0.9	13.4	4.2	0.09	1.24	0
21	2	1	1	1	1	0	1	212.44	70-79	27.869	1.80648	47.9291	116.479	1	1	1	116	58	2	0	0	0	0	2	1	1.06	12.7	4.3	0.09	1.14	0
21	3	1	1	1	1	0	1	299.03	70-79	28.7106	1.82947	47.3269	163.806	1	1	1	118	55	3	0	0	0	0	2	1	1.1	13	4.2	0.4	1.26	0
21	4	1	1	1	1	0	1	385.95	70-79	28.7293	1.82998	47.5012	211.307	1	1	1	95	58	1	0	0	0	0	2	1	1.25	12.9	4.3	0.1	1.16	0
22	1	2	0	0	0	0	0	93.89	50-59	20.6192	1.51348	62.0344	62.0344	0	2	1	95	55	1	0	0	0	0	2	1	0.46	12.9	4.2	0.03	0.55	0
23	1	1	1	1	0	0	0	113.89	60-69	23.2783	1.66861	68.2544	68.2544	1	1	1	140	72	4	0	0	0	0	2	1	0.7	12.2	4.4	0.02	0.8	0
23	2	1	1	1	0	0	0	227.78	60-69	22.0018	1.62909	69.9102	138.165	1	1	1	114	73	2	0	0	0	0	2	1	0.75	12.2	4.1	0.33	0.78	0
23	3	1	1	1	0	0	0	327.78	60-69	22.64	1.64901	60.6424	198.807	1	2	1	124	72	3	0	0	0	0	2	1	0.64	10.7	4.5	0.01	1.05	1
23	4	1	1	1	0	0	0	427.78	60-69	20.9692	1.59615	62.6508	261.458	1	1	1	100	68	1	0	0	0	0	2	1	0.62	9.3	4.5	0.03	0.83	0
24	1	3	1	0	0	0	0	45.3	60-69	17.0643	1.55653	29.1033	29.1033	1	1	1	105	60	1	0	0	0	0	1	1	0.51	12.1	4.2	0.02	0.55	0
25	1	1	1	1	1	0	0	113.52	60-69	18.4054	1.46083	77.709	77.709	1	1	1	125	71	3	1	1	1	0	2	1	0.79	12.4	4.3	0.05	2.44	1
26	1	2	1	0	0	0	0	127.36	60-69	23.7935	1.61005	79.1033	79.1033	1	2	1	136	77	4	0	0	0	0	2	1	0.6	12.4	3.6	2.76	0.8	0
27	1	1	1	1	1	0	0	119.52	60-69	16.9836	1.49899	79.7336	79.7336	1	1	1	126	69	3	1	1	0	1	2	1	1.03	12.9	3.6	0.06	1.44	0
27	2	1	1	1	1	0	1	204.52	60-69	16.0038	1.46161	58.1551	137.889	1	1	1	120	64	3	1	0	0	1	2	1	1.53	8.7	2.9	0.04	1.47	0
27	3	1	1	1	1	0	1	282.52	60-69	16.9292	1.49695	52.106	189.995	1	1	1	146	84	4	1	1	0	1	2	1	1.29	8.4	3.2	0.41	1.59	0
28	1	2	1	0	0	0	0	122.03	50-59	22.4793	1.67267	72.952	72.952	1	2	1	112	74	2	0	0	0	0	2	1	0.61	12.9	3.8	0.09	0.72	0
28	2	2	1	0	0	0	0	253.87	50-59	23.1038	1.69227	77.9074	150.859	1	2	1	121	78	3	0	0	0	0	2	1	0.7	13.4	3.6	0.11	0.64	0
29	1	1	1	1	0	0	0	99.52	50-59	19.9594	1.60546	61.9886	61.9886	1	2	1	97	67	1	0	0	0	0	2	1	0.51	12.5	3.8	1.59	1.12	1
29	2	1	1	1	0	0	0	199.04	50-59	19.8142	1.60048	62.1812	124.17	1	2	1	95	65	1	0	0	0	0	2	1	0.93	11.8	4	0.78	0.92	0
30	1	2	1	1	0	0	0	134.1	40-49	26.8557	1.82993	73.2815	73.2815	1	1	1	124	77	3	0	0	0	0	2	1	0.82	15.2	4.2	0.2	0.89	0
30	2	2	1	1	0	0	0	272.34	40-49	24.8176	1.76957	78.1209	151.402	0	2	1	117	89	2	0	0	0	0	2	1	0.71	14.6	4.1	0.07	0.67	0
30	3	2	1	1	0	0	0	409.3	40-49	23.8617	1.74027	78.7004	230.103	0	2	0	119	83	3	0	0	0	0	2	1	0.71	13	4.1	0.2	0.74	0
31	1	1	1	1	0	0	0	66	60-69	20.3594	1.36572	48.3263	48.3263	1	2	0	84	60	1	0	0	0	0	0	0	0.71	7.9	2.4	4.84	4.42	1
32	1	2	0	1	0	0	0	119.52	50-59	20.8396	1.53396	77.9161	77.9161	0	1	1	139	70	4	0	0	0	0	2	1	0.51	13.6	4.6	0.1	0.52	0
32	2	2	0	1	0	0	0	237.2	50-59	20.1312	1.51158	77.8526	155.769	0	2	1	123	71	3	0	0	0	0	2	1	0.52	12.7	4.3	0.36	0.65	0
33	1	2	1	1	1	1	0	63.87	50-59	21.2484	1.64092	38.905	38.905	1	2	1	140	88	4	0	0	0	0	3	1	0.96	11.4	3	0.56	1.18	0
34	1	1	1	1	0	1	0	141.36	50-59	19.9943	1.79334	78.8249	78.8249	1	1	1	131	81	4	0	0	0	0	2	1	0.74	14.1	4.4	0.36	0.81	0
34	2	1	1	1	0	1	0	282.72	50-59	20.824	1.83268	77.133	155.958	1	1	1	125	77	3	0	0	0	0	2	1	0.6	13.2	4.2	0.14	0.8	0
34	3	1	1	1	0	1	0	424.08	50-59	21.2252	1.83946	76.8487	232.807	1	2	1	149	92	4	0	0	0	0	2	1	0.72	12.6	4.2	1.33	0.93	0
34	4	1	1	1	0	1	0	553.72	50-59	22.7856	1.90415	68.0827	300.889	1	1	1	125	90	3	0	0	0	0	2	1	0.86	11.3	3.8	10.76	0.93	0
34	5	1	1	1	0	1	0	683.36	50-59	21.8126	1.86916	69.3572	370.246	1	1	1	143	96	4	0	0	0	0	2	1	0.87	10.8	3.8	0.64	1.05	0
35	1	1	1	1	1	1	0	102.4	70-79	14.125	1.32476	77.2973	77.2973	1	2	0	109	84	2	0	0	0	0	2	1	0.58	8.6	2	4.15	0.53	0
35	2	1	1	1	1	1	0	202.4	70-79	14.9321	1.35641	73.7238	151.021	1	2	1	118	62	3	0	0	0	0	2	1	0.44	8.6	2.8	1.5	0.56	0
36	1	2	1	1	1	0	0	139.68	70-79	25.1974	1.75582	79.5526	79.5526	0	2	1	123	70	3	1	1	1	1	2	1	0.75	12.6	4.1	0.2	1.15	1
37	1	2	1	1	0	0	0	153.5	60-69	21.2802	1.56298	98.21	98.21	1	1	1	143	87	4	0	0	0	0	0	0	0.57	14.8	3.9	0.04	0.8	0
37	2	2	1	1	0	0	0	302.8	60-69	20.0364	1.52348	97.9993	196.209	1	1	1	99	64	1	0	0	0	0	0	0	0.62	14.2	4	0.04	0.69	0
37	3	2	1	1	0	0	0	446.8	60-69	19.3562	1.50128	95.9181	292.127	1	1	1	111	76	2	0	0	0	0	0	0	0.46	13	3.7	0.01	0.65	0
38	1	2	1	1	0	0	0	101	60-69	18.0444	1.31116	77.031	77.031	1	2	1	100	69	1	0	0	0	0	2	1	0.66	11.2	3.4	0.31	2.08	1
38	2	2	1	1	0	0	0	194.3	60-69	17.7695	1.28898	72.3828	149.414	1	2	1	107	60	2	0	0	0	0	3	1	0.9	9.9	3.5	0.12	1.31	0
39	1	2	1	1	0	0	0	136.4	50-59	22.0154	1.37474	99.219	99.219	1	2	0	123	73	3	0	0	0	0	0	0	0.64	11.2	3.3	0.11	0.66	0
39	2	2	1	1	0	0	0	271	50-59	22.5046	1.38764	96.9994	196.218	1	2	0	125	72	3	0	0	0	0	0	0	0.54	10.3	3.3	1.24	0.62	0
39	3	2	1	1	0	0	0	407.6	50-59	23.5763	1.41535	96.5135	292.732	1	2	1	127	84	3	0	0	0	0	0		0.61	11.2	3.6	0.19	0.72	0
40	1	1	1	1	1	0	0	85.5	60-69	16.4578	1.37795	62.0517	62.0517	1	2	0	141	80	4	0	0	0	0	2	1	0.91	13.6	3.7	0.33	0.99	0
40	2	1	1	1	1	0	0	189.82	60-69	16.0199	1.3663	76.3519	138.404	1	2	1	134	78	4	0	0	0	0	2	1	0.89	12.8	3.7	0.1	0.94	0
41	1	2	1	1	0	0	0	120.08	50-59	17.4405	1.54921	77.5103	77.5103	0	1	1	94	57	1	0	0	0	0	2	1	0.61	13.2	4.2	0.04	0.92	1
41	2	2	1	1	0	0	0	240.16	50-59	17.211	1.54052	77.9479	155.458	0	2	1	92	58	1	0	0	0	0	2	1	0.73	11.9	3.7	0.33	0.99	0
42	1	2	1	1	0	0	0	92.58	70-79	21.298	1.58045	58.5781	58.5781	1	2	1	122	70	3	0	0	0	0	2	1	0.75	13.4	4.3	0.48	0.77	0
43	1	1	1	1	0	0	0	140.08	60-69	25.5932	1.79286	78.1321	78.1321	1	2	1	114	95	2	0	0	0	0	2	1	0.7	13.7	3.8	0.52	1.56	1
43	2	1	1	1	0	0	0	250.08	60-69	24.6914	1.76573	62.297	140.429	1	1	1	133	69	4	0	0	0	0	2	1	1.18	12.2	3.7	0.39	1.46	0
44	1	1	1	1	0	0	0	107.6	50-59	17.8383	1.38511	77.6832	77.6832	1	2	1	94	62	1	0	0	0	0	2	1	0.63	12.3	3.9	14.26	0.8	0
44	2	1	1	1	0	0	0	215.2	50-59	17.8383	1.38511	77.6832	155.366	1	2	0	100	79	1	0	0	0	0	2	1	0.8	11.3	4	0.52	1.11	0
45	1	2	0	1	0	0	0	124.8	60-69	18.8147	1.58949	78.5155	78.5155	0	2	1	110	58	2	0	0	0	0	2	1	0.65	12.7	4.1	0.09	0.84	0
45	2	2	0	1	0	0	0	242.56	60-69	16.9279	1.51969	77.4897	156.005	0	2	1	90	56	1	0	0	0	0	2	1	0.44	10.8	3.5	2.39	0.66	1
46	1	1	1	0	0	0	0	127.04	60-69	23.1087	1.62825	78.0223	78.0223	1	1	1	109	80	2	0	0	0	0	2	1	0.75	13.6	4	0.07	1.06	0
46	2	1	1	0	0	0	0	251.52	60-69	22.067	1.59665	77.9635	155.986	1	2	1	114	76	2	0	0	0	0	2	1	1.03	13.9	4.1	0.12	1.21	0
46	3	1	1	0	0	0	0	351.52	60-69	19.7381	1.49304	66.9774	222.963	1	2	1	110	69	2	0	0	0	0	2	1	0.9	12.4	4.7	0.02	1.76	1
46	4	1	1	0	0	0	0	451.52	60-69	19.9359	1.49938	66.6942	289.657	1	2	0	92	59	1	0	0	0	0	2	1	1.31	10.6	3.3	0.16	1.4	0
47	1	1	0	0	1	0	0	110	60-69	19.8249	1.42678	77.0967	77.0967	1	2	0	135	93	4	1	1	0	0	3	1	0.81	13.7	2.5	3.85	0.91	0
47	2	1	0	0	1	0	0	208	60-69	19.5728	1.41904	69.0606	146.157	1	2	0	109	80	2	1	1	0	0	3	1	0.75	11.3	2.5	1.83	0.93	0
48	1	1	1	1	1	0	0	112.56	70-79	16.1616	1.45382	77.4238	77.4238	1	1	1	138	80	4	1	1	1	0	2	1	0.51	13.5	4.1	0.46	0.69	0
48	2	1	1	1	1	0	0	245.12	70-79	15.8678	1.44252	78.0299	155.454	1	1	1	143	63	4	1	1	1	0	2	1	0.63	12	3.9	0.01	0.75	0
49	1	2	1	0	1	0	0	117.04	60-69	22.1965	1.48477	78.8272	78.8272	1	1	1	105	61	1	1	1	0	1	2	1	0.47	11.9	3.3	1.16	0.73	1
50	1	1	1	0	0	0	0	127.76	60-69	21.8111	1.61994	78.8669	78.8669	1	1	1	132	65	4	0	0	0	0	2	1	0.66	14.3	3.8	0.37	1.11	1
50	2	1	1	0	0	0	0	253.2	60-69	21.4912	1.6098	77.9226	156.79	1	2	1	130	84	4	0	0	0	0	2	1	0.67	13.1	3.9	0.15	1.07	1
51	1	1	0	0	1	0	0	45.16	70-79	14.9099	1.1649	38.7674	38.7674	1	2	1	128	83	4	0	0	0	0	2	1	0.73	12.3	4.3	0.08	0.81	0
52	1	2	1	1	0	0	0	140.1	40-49	20.7589	1.91164	73.288	73.288	1	2	1	114	65	2	0	0	0	0	2	1	0.99	15.3	5	3.79	1.49	1
52	2	2	1	1	0	0	0	284.94	40-49	19.9571	1.8799	77.5787	150.867	1	2	1	118	85	3	0	0	0	0	2	1	0.83	11.6	4.1	0.1	0.94	0
52	3	2	1	1	0	0	0	429.7	40-49	19.4819	1.86074	77.2594	228.126	1	2	1	123	79	3	0	0	0	0	2	1	0.88	10.9	4.2	0.08	0.95	0
53	1	2	1	0	0	0	0	73.92	70-79	15.2402	1.37091	53.9203	53.9203	0	1	1	111	75	2	0	0	0	0	2	1	0.74	11.3	3.3	2.73	0.86	0
54	1	2	0	1	1	1	0	143.84	40-49	24.654	1.82337	78.8868	78.8868	0	2	1	130	84	4	1	1	1	0	2	1	0.62	12.8	4.1	0.03	0.81	0
54	2	2	0	1	1	1	0	284.56	40-49	23.7889	1.7959	78.3562	157.243	0	2	1	124	88	3	1	1	0	0	2	1	0.72	12.9	3.8	0.05	0.73	0
55	1	1	0	1	1	1	0	129.84	70-79	23.5701	1.64842	78.7663	78.7663	1	2	0	104	62	1	1	1	1	0	2	1	0.8	12.9	4	0.15	1.69	1
55	2	1	0	1	1	1	0	233.71	70-79	22.9559	1.63003	63.7242	142.49	1	1	1	116	86	2	1	1	1	0	2	1	1.05	11.4	3.8	0.01	1.2	0
56	1	2	1	0	0	0	0	92.48	70-79	16.3114	1.4903	62.0548	62.0548	1	2	1	107	65	2	0	0	0	0	2	1	0.8	11.1	2.8	9.62	1.2	1
56	2	2	1	0	0	0	0	206.64	70-79	15.6676	1.46501	77.9246	139.979	0	2	1	139	73	4	0	0	0	0	3	1	0.81	10.7	3.2	0.91	1.2	0
57	1	3	1	0	0	0	0	37	80-89	16.1759	1.53852	24.049	24.049	1	1	0	117	74	2	0	0	0	0	0	0	0.78	6.9	2.8	3.14	0.84	0
58	1	2	1	1	1	0	0	139.84	60-69	24.1615	1.78274	78.4409	78.4409	0	1	1	120	65	3	1	0	0	1	2	1	0.72	13.5	4.1	0.01	0.91	0
58	2	2	1	1	1	0	0	276.88	60-69	23.4571	1.76047	77.843	156.284	0	2	1	110	59	2	1	0	0	1	2	1	0.8	13.2	3.7	2.48	1.24	1
59	1	2	1	0	0	0	0	118.32	70-79	18.9784	1.50487	78.6248	78.6248	0	2	1	126	60	3	0	0	0	0	2	1	0.73	14	4.4	0.39	0.71	0
60	1	2	1	1	1	1	1	134.48	50-59	23.9302	1.71773	78.2892	78.2892	0	2	1	113	61	2	0	0	0	0	2	1	0.95	13	4	0.32	1.71	1
60	2	2	1	1	1	1	1	200.36	50-59	22.4059	1.67035	39.4408	117.73	0	2	0	101	59	1	0	0	0	0	2	1	1.26	12.4	3.8	0.66	1.39	0
61	1	1	1	0	0	0	0	94	60-69	16.2672	1.42045	66.1762	66.1762	1	2	1	92	51	1	0	0	0	0	2	1	0.6	12.7	3.5	2.93	0.7	0
61	2	1	1	0	0	0	0	188	60-69	16.4571	1.42747	65.8507	132.027	1	2	0	108	75	2	0	0	0	0	2	1	0.56	9.7	3	0.65	0.66	0
61	3	1	1	0	0	0	0	282	60-69	16.6848	1.43584	65.4671	197.494	1	2	1	123	69	3	0	0	0	0	3	1	0.64	11.2	3.8	0.8	0.65	0
61	4	1	1	0	0	0	0	376	60-69	17.7564	1.47004	63.9439	261.438	1	1	1	132	84	4	0	0	0	0	2	1	0.65	11.3	4	4.85	1.45	1
62	1	3	0	1	1	1	1	100	70-79	21.3531	1.77609	56.3034	56.3034	1	1	0	125	63	3	0	0	0	0	2	1	0.74	11.3	3.6	0.45	0.86	0
62	2	3	0	1	1	1	1	200	70-79	19.8003	1.73562	57.6163	113.92	1	2	0	113	65	2	0	0	0	0	2	1	0.74	9.9	3.8	0.04	0.84	0
63	1	1	1	0	0	0	0	131.36	60-69	21.8464	1.6683	78.739	78.739	1	1	1	104	67	1	0	0	0	0	2	1	0.72	11.4	3.2	2.26	0.91	0
63	2	1	1	0	0	0	0	258.64	60-69	21.0155	1.64414	77.4142	156.153	1	1	1	131	91	4	0	0	0	0	2	1	0.84	9.7	3.3	0.73	0.89	0
64	1	1	1	1	0	0	0	100	70-79	17.8381	1.52189	65.7078	65.7078	1	1	1	117	72	2	0	0	0	0	2	1	0.9	11.7	4.3	0.02	1.43	1
64	2	1	1	1	0	0	0	180	70-79	17.4543	1.50789	53.0544	118.762	1	1	0	106	62	1	0	0	0	0	2	1	0.98	10.6	3.9	0.02	0.99	0
64	3	1	1	1	0	0	0	280	70-79	17.0843	1.47435	67.8267	186.589	1	1	1	105	72	1	0	0	0	0	2	1	1.14	10.9	3.6	0.27	1.07	0
65	1	3	1	0	1	0	0	96	60-69	27.5827	1.63842	58.593	58.593	1	1	1	120	81	3	1	1	0	0	0	0	0.8	13.4	4.2	0.07	0.95	0
65	2	3	1	0	1	0	0	192	60-69	27.6556	1.64865	58.2294	116.822	1	1	1	122	76	3	1	1	0	0	0	0	0.95	13.1	4.3	0.07	1.17	0
65	3	3	1	0	1	0	0	288	60-69	26.7014	1.63086	58.8648	175.687	1	1	1	90	68	1	1	1	0	0	0	0	0.94	11.2	4.1	0.18	1.08	0
65	4	3	1	0	1	0	0	384	60-69	27.3233	1.63019	58.8888	234.576	1	1	0	123	78	3	1	1	0	0	1	1	0.92	10.9	4	0.56	1.97	1
66	1	1	1	1	1	0	0	111.93	60-69	20.9723	1.65986	67.4333	67.4333	1	1	1	120	69	3	0	0	0	0	2	1	0.79	16.2	4	0.06	0.82	0
66	2	1	1	1	1	0	0	223.86	60-69	19.8647	1.62203	69.0063	136.44	1	1	1	128	75	4	0	0	0	0	2	1	0.78	14.4	3.9	0.26	0.88	0
67	1	2	0	1	0	0	0	138.08	40-49	20.9458	1.77761	77.6775	77.6775	0	1	1	98	62	1	0	0	0	0	2	1	0.8	13.4	4.5	0.1	0.94	0
67	2	2	0	1	0	0	0	276.16	40-49	20.4222	1.75858	78.5179	156.195	0	1	1	102	55	1	0	0	0	0	2	1	0.86	12.7	4.5	0.15	1.34	1
68	1	2	1	1	0	0	0	139.92	50-59	25.1826	1.79238	78.0636	78.0636	0	1	1	140	78	4	0	0	0	0	2	1	0.89	13.6	4.2	0.09	0.75	0
68	2	2	1	1	0	0	0	138	50-59	23.8054	1.75005	78.8549	156.919	0	1	0	103	65	1	0	0	0	0	2	1	0.69	13.1	4.3	0.14	0.78	0
69	1	3	0	1	0	0	0	90	40-49	17.0194	1.56923	57.3531	57.3531	1	1	1	124	80	3	0	0	0	0	2	1	0.51	12.1	4.3	0.04	0.8	1
70	1	1	1	1	1	1	0	118.96	70-79	19.5117	1.50639	78.97	78.97	1	1	1	141	61	4	1	1	1	1	2	1	0.76	13.2	4.1	0.02	5.74	1
71	1	1	1	1	1	1	0	115.36	60-69	22.6085	1.69279	68.148	68.148	1	2	1	127	75	3	1	1	0	0	2	1	0.76	13.4	4.9	0.32	0.75	0
71	2	1	1	1	1	1	0	230.72	60-69	22.3908	1.68584	68.4289	136.577	1	2	1	126	75	3	1	1	0	0	2	1	0.65	13.8	4.7	0.21	0.82	0
72	1	1	1	1	0	0	0	135	50-59	22.5657	1.73982	77.5943	77.5943	1	2	1	115	60	2	0	0	0	0	2	1	0.59	13.8	3.4	0.73	0.82	0
72	2	1	1	1	0	0	0	270	50-59	23.5389	1.76967	76.2854	153.88	1	2	1	146	73	4	0	0	0	0	2	1	0.7	11.5	3.4	0.22	0.79	0
72	3	1	1	1	0	0	0	405	50-59	24.6654	1.7867	75.5584	229.438	1	2	1	125	68	3	0	0	0	0	2	1	0.79	10	3.2	0.05	0.92	0
72	4	1	1	1	0	0	0	540	50-59	23.8144	1.79006	75.4163	304.854	1	2	1	133	76	4	0	0	0	0	2	1	0.87	9.4	3.2	1.67	1.15	0
72	5	1	1	1	0	0	0	675	50-59	24.1335	1.80189	74.9212	379.776	1	2	1	117	55	2	0	0	0	0	2	1	0.94	8.8	3.3	0.39	1.15	0
72	6	1	1	1	0	0	0	792.6	50-59	21.8244	1.7265	68.1149	447.89	1	2	1	101	63	1	0	0	0	0	2	1	1.03	9	3.4	0.3	1.41	0
72	7	1	1	1	0	0	0	888.02	60-69	22.6242	1.74986	54.5325	502.423	1	2	1	115	61	2	0	0	0	0	2	1	1.06	8.6	3.2	0.13	1.34	0
72	8	1	1	1	0	0	0	972.65	60-69	23.4422	1.77647	47.6355	550.058	1	1	1	112	70	2	0	0	0	0	2	1	1.32	8.1	3.2	2.49	1.33	0
72	9	1	1	1	0	0	0	1057.27	60-69	23.196	1.7718	47.7609	597.819	1	1	1	112	65	2	0	0	0	0	2	1	1.18	9.3	3.6	0.39	1.35	0
73	1	2	1	0	0	0	0	123.84	70-79	19.2537	1.57509	78.6242	78.6242	0	2	1	133	86	4	0	0	0	0	2	1	0.87	11.6	3.7	0.07	1.45	1
74	1	1	1	0	1	1	0	79.23	80-89	25.4861	1.67591	47.2776	47.2776	1	1	1	110	65	2	0	0	0	0	2	1	0.82	12.8	4.3	0.03	0.97	0
74	2	1	1	0	1	1	0	158.23	80-89	24.0942	1.63638	48.2773	95.5549	1	1	1	101	49	1	0	0	0	0	2	1	0.85	12.7	4.3	3.94	0.89	0
75	1	1	1	0	1	0	0	87	60-69	22.9568	1.47998	58.7844	58.7844	1	2	0	125	83	3	1	1	0	0	2	1	0.51	12.1	4.4	0.04	0.55	0
75	2	1	1	0	1	0	0	174	60-69	21.9587	1.45229	59.9055	118.69	1	2	1	115	78	2	0	0	0	0	2	1	0.55	10.9	4	0.1	0.56	0
76	1	1	1	1	0	0	0	140	60-69	29.1937	1.82123	76.8709	76.8709	1	2	1	137	88	4	0	0	0	0	2	1	0.84	11.4	4	1.3	0.93	0
76	2	1	1	1	0	0	0	280	60-69	29.1937	1.82123	76.8709	153.742	1	2	0	137	71	4	0	0	0	0	3	1	0.93	11.9	4	0.48	1.37	0
76	3	1	1	1	0	0	0	397.25	60-69	25.3215	1.71435	68.3931	222.135	1	2	0	108	72	2	0	0	0	0	2	1	0.74	9.5	3.2	1.71	1.18	1
77	1	2	1	0	1	0	0	126.96	60-69	20.1451	1.62864	77.9544	77.9544	0	2	1	134	72	4	1	0	1	1	2	1	0.73	13.3	4	0.66	1.07	0
77	2	2	1	0	1	0	0	251.28	60-69	19.59	1.60942	77.2453	155.2	0	2	1	131	69	4	1	0	1	0	2	1	0.92	12.3	4	0.3	0.95	0
77	3	2	1	0	1	0	0	378	60-69	20.1997	1.62591	77.9379	233.138	1	1	1	106	61	1	1	0	1	1	2	1	0.86	12.7	4	2.72	1.79	1
78	1	2	0	1	1	0	0	134.16	70-79	26.8383	1.70133	78.8561	78.8561	1	1	1	112	74	2	1	1	1	0	2	1	0.79	14.8	3.7	0.3	1.08	0
78	2	2	0	1	1	0	0	263.92	70-79	25.7719	1.65903	78.2144	157.071	0	1	1	123	84	3	0	0	0	0	2	1	0.74	12	3.8	0.79	0.93	0
79	1	1	1	1	0	0	0	75	60-69	18.5482	1.27542	58.804	58.804	1	1	1	106	68	1	0	0	0	0	2	1	0.41	13.5	4.1	0.22	0.44	0
79	2	1	1	1	0	0	0	150	60-69	19.0014	1.28858	58.2038	117.008	1	1	1	86	46	1	0	0	0	0	2	1	0.37	11.9	3.5	0.34	0.42	0
79	3	1	1	1	0	0	0	236	60-69	19.1789	1.29368	66.4771	183.485	1	1	0	117	68	2	0	0	0	0	1	1	0.38	10.8	3.4	0.23	0.43	0
79	4	1	1	1	0	0	0	322	60-69	19.1089	1.29167	66.5806	250.065	1	1	1	90	69	1	0	0	0	0	1	1	0.4	11.7	3.7	0.06	0.37	0
79	5	1	1	1	0	0	0	413.35	60-69	21.2271	1.34052	68.1451	318.211	1	1	0	94	60	1	0	0	0	0	2	1	0.47	12.9	4.4	0.21	0.61	0
79	6	1	1	1	0	0	0	504.7	60-69	21.1091	1.33735	68.3067	386.517	1	1	1	103	60	1	0	0	0	0	2	1	0.46	12.5	3.9	0.81	0.71	1
80	1	2	1	1	0	0	0	125.44	40-49	17.8839	1.59967	78.4163	78.4163	0	2	1	110	70	2	0	0	0	0	2	1	0.64	11.1	4	0.21	1.12	1
80	2	2	1	1	0	0	0	251.92	40-49	18.4852	1.62231	77.963	156.379	0	2	0	102	72	1	0	0	0	0	2	1	0.95	10.6	4.1	0.2	1.13	0
81	1	2	1	1	0	0	0	148.8	40-49	23.6203	1.88763	78.8289	78.8289	0	1	1	110	66	2	0	0	0	0	2	1	0.95	14.5	4	0.23	1.08	0
81	2	2	1	1	0	0	0	296.56	40-49	23.0702	1.86882	79.0658	157.895	0	1	1	119	65	3	0	0	0	0	2	1	1.08	13.6	4	0.87	1.06	0
82	1	1	1	1	0	0	0	101.29	60-69	19.7136	1.48782	68.0795	68.0795	1	2	1	104	58	1	0	0	0	0	2	1	0.83	11.8	3.2	6.49	1.01	0
82	2	1	1	1	0	0	0	202.58	60-69	20.4878	1.51238	66.9739	135.053	1	2	1	121	63	3	0	0	0	0	2	1	1.01	11.3	3.6	0.78	1.15	0
82	3	1	1	1	0	0	0	289.58	60-69	20.1869	1.49843	58.061	193.114	1	2	1	114	56	2	0	0	0	0	2	1	1.12	10.2	3.6	0.31	1.1	0
82	4	1	1	1	0	0	0	376.58	60-69	20.7983	1.51906	57.2724	250.387	1	2	1	107	63	2	0	0	0	0	2	1	1.09	9.8	3.7	2.79	1.12	0
82	5	1	1	1	0	0	0	466.58	60-69	20.6677	1.52253	59.1121	309.499	1	2	1	115	78	2	0	0	0	0	2	1	1.12	10.4	3.8	1.68	1.45	0
83	1	1	1	1	0	0	0	144	60-69	21.7893	1.85186	77.7598	77.7598	1	2	1	111	74	2	0	0	0	0	1	1	0.63	13.8	3.6	0.12	0.93	0
83	2	1	1	1	0	0	1	288	60-69	21.2974	1.83397	78.5182	156.278	1	2	0	140	88	4	0	0	0	0	1	1	0.77	13.1	3.7	0.06	1.05	0
84	1	3	0	0	0	0	0	88	50-59	19.6427	1.51217	58.1946	58.1946	1	1	0	98	46	1	0	0	0	0	1	1	0.39	14.2	4.4	0.03	0.48	0
84	2	3	0	0	0	0	0	175	50-59	20.6883	1.48862	58.4434	116.638	1	1	1	120	70	3	0	0	0	0	1	1	0.48	13.1	4.1	0.01	0.46	0
84	3	3	0	0	0	0	0	262	50-59	19.4239	1.45654	59.7307	176.369	1	1	1	121	82	3	0	0	0	0	1	1	0.46	13.3	4.3	0.02	0.48	0
84	4	3	0	0	0	0	0	349	50-59	20.8604	1.50138	57.9466	234.315	1	1	1	124	74	3	0	0	0	0	1	1	0.41	13.1	4.3	0.01	0.42	0
84	5	3	0	0	0	0	0	436	50-59	21.0529	1.49068	58.3628	292.678	1	1	1	127	72	3	0	0	0	0	1	1	0.39	12.1	4.3	0.01	0.42	0
84	6	3	0	0	0	0	0	523	50-59	21.3264	1.49737	58.1021	350.78	1	1	0	120	70	3	0	0	0	0	1	1	0.4	12	4.5	0.01	0.46	0
84	7	3	0	0	0	0	0	610	50-59	21.6149	1.50138	57.9466	408.727	1	1	1	115	76	2	0	0	0	0	1	1	0.37	11.2	4.2	0.01	0.46	0
84	8	3	0	0	0	0	0	697	50-59	21.3262	1.49283	58.2787	467.005	1	1	0	114	70	2	0	0	0	0	1	1	0.42	11.3	4.2	0.12	0.44	0
84	9	3	0	0	0	0	0	784	50-59	21.6562	1.5026	57.8997	524.905	1	1	0	120	81	3	0	0	0	0	1	1	0.44	11.2	3.9	0.24	0.5	0
85	1	2	0	0	0	0	0	129.6	50-59	19.7301	1.33056	97.4029	97.4029	1	1	1	97	68	1	0	0	0	0	0	0	0.49	12	3.9	0.14	0.61	0
85	2	2	0	0	0	0	0	252.9	50-59	16.7555	1.24923	98.7009	196.104	1	1	1	93	61	1	0	0	0	0	1	1	0.53	11.3	3.8	0.03	0.52	0
86	1	1	1	1	1	1	0	117.39	60-69	21.5261	1.67835	69.9437	69.9437	1	2	1	102	66	1	1	1	0	0	0	0	0.87	12.1	4.1	0.29	0.94	0
87	1	1	1	1	1	0	0	130	70-79	23.4409	1.70759	76.1305	76.1305	1	2	1	124	58	3	1	1	1	0	2	1	0.6	12.6	4	1.12	0.81	0
87	2	1	1	1	1	0	0	263.2	70-79	23.4409	1.70759	78.0045	154.135	1	2	1	123	66	3	1	1	1	0	2	1	0.73	11.6	3.7	1.63	0.79	0
88	1	3	1	0	0	0	0	47	70-79	23.14	1.60702	29.25	29.25	1	1	1	108	74	2	0	0	0	0	0	0	1.13	13.5	3.5	0.53	0.92	0
89	1	1	1	0	0	0	0	100	40-49	23.76	1.70442	58.671	58.67	1	1	1	105	65	1	0	0	0	0	1	1	0.59	9.9	3.5	0.14	0.7	0
89	2	1	1	0	0	0	0	200	50-59	23.24	1.68026	59.5145	118.19	1	1	1	134	76	4	0	0	0	0	1	1	0.53	10.2	2.9	0.88	0.62	0
90	1	2	1	1	0	0	0	159.52	40-49	29.89	2.03773	78.283	78.28	0	1	1	142	86	4	0	0	0	0	2	1	0.8	15.7	4.2	0.23	1.02	0
90	2	2	1	1	0	0	0	318.48	40-49	29.57	2.02853	78.3622	156.65	0	1	1	133	91	4	0	0	0	0	2	1	0.75	14.8	4.1	0.16	0.9	0
91	1	3	1	0	1	1	0	78	70-79	18.2426	1.33251	58.5363	58.5363	1	1	1	135	76	4	1	1	1	0	1	1	0.68	9.4	3	1.43	0.71	0
91	2	3	1	0	1	1	0	156	70-79	18.6037	1.33806	58.2935	116.83	1	1	1	115	69	2	1	1	1	0	1	1	0.66	9.6	3.7	0.04	0.8	0
91	3	3	1	0	1	1	0	234	70-79	18.2385	1.30609	59.7203	176.55	1	1	0	109	78	2	1	1	1	0	1	1	0.68	9.8	4	0.08	0.74	0
91	4	3	1	0	1	1	0	286	70-79	18.3508	1.3095	39.7098	216.26	1	1	1	134	68	4	1	1	1	0	1	1	0.74	9.9	4	2.38	0.66	0
91	5	3	1	0	1	1	0	338	70-79	18.3508	1.3095	39.7098	255.97	1	1	1	106	70	1	1	1	1	0	1	1	0.55	9.6	3.8	0.03	0.63	0
91	6	3	1	0	1	1	0	390	70-79	18.1798	1.31395	39.5753	295.545	1	1	1	130	64	4	1	1	1	0	1	1	0.63	9.4	3.7	0.07	0.66	0
92	1	1	1	1	1	1	0	102	70-79	25.73	1.86541	54.6796	54.68	1	1	1	141	78	4	1	1	1	0	2	1	1	12.9	4.2	0.03	1.11	0
92	2	1	1	1	1	1	0	202	70-79	25.86	1.86594	53.5923	108.27	1	1	1	123	71	3	1	1	1	0	2	1	1.01	12.5	4	0.1	1.14	0
93	1	2	0	1	0	0	0	155.92	60-69	25.91	1.99854	78.017	78.02	0	1	1	109	75	2	0	0	0	0	2	1	0.72	14.4	3.8	0.11	0.8	0
93	2	2	0	1	0	0	0	309.76	60-69	24.69	1.95806	78.5677	156.58	0	2	1	111	78	2	0	0	0	0	2	1	0.71	12.9	4	0.75	0.8	0
94	1	1	1	1	1	0	1	133	70-79	25.75	1.70493	78.009	78.009	1	1	0	108	64	2	1	1	1	0	1	1	0.66	12.4	3.6	2.88	0.83	0
94	2	1	1	1	1	0	1	266	70-79	25.75	1.70493	78.009	156.018	1	1	1	133	78	4	0	0	0	0	1	1	0.71	11	3.6	0.45	0.9	0
95	1	2	0	1	0	1	0	122.96	60-69	20.92	1.5761	78.0155	78.02	0	2	1	124	79	3	0	0	0	0	2	1	0.66	12.1	4	0.06	0.98	0
95	2	2	0	1	0	1	0	222.6	70-79	20.18	1.55206	64.1987	142.21	0	2	0	99	70	1	0	0	0	0	2	1	1.02	11.7	3.8	1.05	0.75	0
96	1	2	1	1	0	0	0	107.28	60-69	15.95	1.38426	77.5	77.5	0	1	0	116	72	2	0	0	0	0	2	1	0.59	9.9	2.9	10.42	0.55	0
97	1	2	1	1	0	0	0	133.44	60-69	17.7	1.73307	76.9964	77	1	2	0	106	48	1	0	0	0	0	2	1	0.48	13.4	3.2	2.77	0.71	0
97	2	2	1	1	0	0	0	239.17	60-69	17.25	1.71431	61.6739	138.67	1	1	1	122	66	3	0	0	0	0	2	1	0.79	11.5	4.1	0.05	1.02	0
97	3	2	1	1	0	0	0	342.89	60-69	16.82	1.69593	61.2479	199.92	1	2	1	96	52	1	0	0	0	0	2	1	0.87	10.5	3.7	0.15	1.63	1
98	1	1	1	0	0	0	0	122	60-69	16.8	1.5464	78.8931	78.89	1	1	1	94	48	1	0	0	0	0	1	1	0.33	11.6	3.7	0.03	0.46	0
98	2	1	1	0	0	0	0	244	60-69	16.16	1.52102	80.2093	159.1	1	1	1	96	62	1	0	0	0	0	1	1	0.44	11.7	4.1	0.04	0.54	0
99	1	1	1	0	0	1	0	103.04	70-79	16.24	1.52111	67.7401	67.74	1	1	1	106	57	1	0	0	0	0	2	1	0.55	11.3	3.9	0.2	0.58	0
99	2	1	1	0	0	1	0	205.1	70-79	15.91	1.50788	67.6845	135.42	1	1	1	99	61	1	0	0	0	0	2	1	0.58	11	3.8	1.8	0.59	0
100	1	1	0	1	0	0	0	100	70-79	23.06	1.33488	74.913	74.913	1	1	1	140	76	4	0	0	0	0	2	1	0.5	12.1	4.2	0.02	0.51	0
100	2	1	0	1	0	0	0	200	70-79	22.51	1.32125	75.6862	150.599	1	1	1	135	68	4	0	0	0	0	2	1	0.46	11.2	4.3	0.04	0.63	0
100	3	1	0	1	0	0	0	271.22	70-79	17.89	1.2198	58.3865	208.986	1	1	1	138	69	4	0	0	0	0	2	1	0.48	11.4	3.9	0.06	0.57	0
100	4	1	0	1	0	0	0	342.44	70-79	17.89	1.2198	58.3865	267.372	1	1	1	134	70	4	0	0	0	0	2	1	0.43	10.3	3.7	0.11	0.55	0
101	1	2	1	0	0	1	0	124.8	50-59	19.64	1.587	78.6389	78.64	0	2	1	148	99	4	0	0	0	0	2	1	0.77	13.7	4.4	0.04	0.72	0
101	2	2	1	0	0	1	0	244.96	50-59	18.8	1.5578	77.6477	156.29	0	2	0	120	86	3	0	0	0	0	2	1	0.65	12.3	4	0.03	0.73	0
102	1	2	1	1	0	0	0	129.44	70-79	21.89	1.65073	78.414	78.41	1	1	1	118	78	3	0	0	0	0	2	1	0.86	15.4	4.5	0.34	0.9	0
103	1	1	1	1	1	0	0	93	60-69	20.2	1.36839	67.9629	67.96	1	1	1	101	59	1	1	0	1	0	2	1	0.58	13.6	4.2	0.03	1.05	1
103	2	1	1	1	1	0	0	184	60-69	19.33	1.34296	67.761	135.72	1	1	1	143	78	4	1	1	1	0	2	1	0.72	11.8	4	0.04	0.79	0
104	1	1	1	1	1	0	0	117.76	60-69	16.36	1.55013	75.9679	75.97	1	1	1	120	68	3	1	0	1	0	2	1	0.94	12.5	3.5	0.45	2.08	1
105	1	1	1	1	0	0	0	117.5	60-69	19.35	1.69539	69.3055	69.31	1	1	1	120	76	3	0	0	0	0	2	1	0.78	13.7	4.1	0.49	0.89	0
105	2	1	1	1	0	0	0	205.7	60-69	19.3	1.69353	52.0806	121.39	1	1	1	100	66	1	0	0	0	0	2	1	0.63	11.1	3.3	0.63	0.72	0
105	3	1	1	1	0	0	0	313.2	60-69	19.01	1.68293	63.8886	185.27	1	1	1	107	76	2	0	0	0	0	2	1	0.63	11.2	3.7	0.27	0.95	1
105	4	1	1	1	0	0	0	417.33	60-69	18.98	1.67706	62.0897	247.36	1	1	1	107	76	2	0	0	0	0	2	1	0.72	11.4	3.8	0.56	0.87	0
106	1	2	0	0	1	1	0	114.88	70-79	23.44	1.45142	79.15	79.15	1	2	0	123	83	3	1	0	1	1	2	1	0.4	12.4	3.7	0.13	0.6	1
106	2	2	0	0	1	1	0	206.66	70-79	24.47	1.47832	62.0815	141.23	1	2	0	123	69	3	1	0	1	1	2	1	0.44	11	3.2	0.77	0.45	0
106	3	2	0	0	1	1	0	298.43	70-79	23.03	1.44071	63.7018	204.93	1	2	0	143	72	4	1	0	1	1	2	1	0.45	10.8	3.4	0.33	0.44	0
106	4	2	0	0	1	1	0	390.21	70-79	22.31	1.4214	64.5672	269.5	1	2	0	117	69	2	1	0	1	1	2	1	0.4	10.1	3.4	0.38	0.45	0
107	1	3	0	0	0	0	0	125	50-59	22.9	1.6379	76.3174	76.32	1	1	1	120	74	3	0	0	0	0	1	1	0.43	11.4	3.3	0.61	0.54	0
107	2	3	0	0	0	0	0	250	50-59	22.48	1.62509	76.9189	153.24	1	1	1	105	63	1	0	0	0	0	1	1	0.49	10.9	3.8	0.05	0.7	0
107	3	3	0	0	0	0	0	375	50-59	22.95	1.63952	76.242	229.48	1	1	1	135	70	4	0	0	0	0	1	1	0.47	11	3.9	0.02	0.66	0
107	4	3	0	0	0	0	0	500	50-59	20.74	1.56279	79.9852	309.46	1	1	1	91	68	1	0	0	0	0	1	1	0.49	11.4	4.1	0.1	3.74	1
108	1	1	1	1	0	0	0	125	70-79	21.09	1.60171	78.0417	78.04	1	1	1	134	90	4	0	0	0	0	1	1	0.59	15	4.1	0.3	0.77	0
108	2	1	1	1	0	0	0	250	70-79	21.02	1.59929	78.1599	156.2	1	1	1	141	74	4	0	0	0	0	1	1	0.7	13.2	3.7	0.16	0.76	0
108	3	1	1	1	0	0	0	340	70-79	18.7	1.5057	59.7729	215.97	1	1	0	104	70	1	1	0	0	1	2	1	0.66	10.5	2.9	0.4	0.84	0
109	1	3	1	1	0	0	0	107	60-69	20.15	1.83137	58.4261	58.43	1	1	1	125	70	3	0	0	0	0	2	1	0.61	15.1	4.1	0.22	0.75	0
109	2	3	1	1	0	0	0	214	60-69	20.32	1.83791	58.2182	116.64	1	1	1	104	60	1	0	0	0	0	2	1	0.75	13.8	4.2	0.05	0.8	0
109	3	3	1	1	0	0	0	321	60-69	20.05	1.84026	58.144	174.79	1	1	1	99	56	1	0	0	0	0	2	1	0.66	11.9	4	0.22	0.82	0
109	4	3	1	1	0	0	0	428	60-69	20.41	1.85258	57.7574	232.55	1	1	1	120	62	3	0	0	0	0	2	1	0.69	10.6	4	0.21	1.05	1
110	1	2	0	0	1	0	0	109.04	60-69	21.3	1.39947	77.9151	77.92	0	2	0	122	62	3	1	1	1	0	2	1	0.53	12.4	4	0.11	0.77	0
110	2	2	0	0	1	0	0	217.84	60-69	20.94	1.38943	78.3057	156.22	0	2	0	116	67	2	1	1	1	0	2	1	0.61	12	4	0.43	0.55	0
111	1	1	1	1	0	0	0	95.9	60-69	17.1	1.41165	67.9349	67.93	1	2	0	126	83	3	0	0	0	0	3	1	0.69	12.1	3.6	1.93	1.18	1
111	2	1	1	1	0	0	0	189.98	60-69	16.82	1.40195	67.1067	135.04	1	2	0	115	60	2	0	0	0	0	3	1	0.75	9.6	3.1	1.14	1.12	0
111	3	1	1	1	0	0	0	300.3	60-69	17.96	1.44156	76.5283	211.57	1	2	0	138	75	4	0	0	0	0	3	1	1	9.4	3.6	0.13	1.37	0
111	4	1	1	1	0	0	0	410.62	60-69	16.96	1.40681	78.4187	289.99	1	2	1	110	75	2	0	0	0	0	3	1	1.12	9.3	4.1	0.08	4.6	1
112	1	1	0	1	1	0	0	120	70-79	19.85	1.55781	77.0312	77.03	1	1	1	127	70	3	1	0	1	0	2	1	0.58	14.4	4.1	0.52	0.83	0
112	2	1	0	1	1	0	0	221.12	70-79	19.17	1.53502	78.9047	155.94	1	1	1	129	69	4	0	0	0	0	2	1	0.78	13.9	3.9	0.18	0.73	0
113	1	2	1	1	0	0	0	130.56	60-69	18.24	1.6717	78.1001	78.1	1	1	1	113	73	2	0	0	0	0	2	1	0.81	14.3	4.3	0.02	1.07	0
113	2	2	1	1	0	0	0	258.16	60-69	17.22	1.6314	78.2151	156.32	1	1	0	153	102	4	0	0	0	0	2	1	0.86	10.2	3.7	0.53	1.09	0
113	3	2	1	1	0	0	0	385.76	60-69	16.81	1.61476	79.0211	235.34	1	1	0	109	64	2	0	0	0	0	2	1	0.89	9.9	3.6	0.12	0.91	0
114	1	2	1	0	0	0	0	119.52	70-79	21.44	1.53734	77.7444	77.74	0	2	1	109	67	2	0	0	0	0	2	1	0.82	12	3.8	0.9	1.23	1
114	2	2	1	0	0	0	0	239.04	70-79	20.65	1.51279	79.0063	156.75	0	2	1	101	58	1	0	0	0	0	2	1	0.8	10.3	3	1.87	0.9	0
115	1	1	1	1	0	0	0	109.2	60-69	20.7	1.40004	77.9978	78	1	1	1	120	51	3	0	0	0	0	2	1	0.56	12.6	4.6	0.23	0.61	0
115	2	1	1	1	0	0	0	218.4	60-69	20.28	1.38794	78.6777	156.68	1	2	1	133	72	4	0	0	0	0	2	1	0.61	10.9	4.3	0.05	0.56	0
115	3	1	1	1	0	0	0	327.6	60-69	20.22	1.39646	78.1977	234.87	1	1	1	117	75	2	0	0	0	0	2	1	0.56	11.1	4.3	0.11	0.7	0
115	4	1	1	1	0	0	0	437.84	60-69	21.11	1.4133	78.0018	312.87	1	1	1	134	73	4	0	0	0	0	2	1	0.7	10.6	4.5	0.11	0.63	0
115	5	1	1	1	0	0	0	549.52	60-69	21.93	1.43942	77.5869	390.46	1	1	1	130	83	4	0	0	0	0	2	1	0.61	10.4	4.1	0.08	0.75	0
115	6	1	1	1	0	0	0	662.08	60-69	22.17	1.44161	78.0793	468.54	1	1	1	136	75	4	0	0	0	0	2	1	0.75	10.5	4.5	0.15	0.87	0
115	7	1	1	1	0	0	0	761.39	60-69	23.25	1.4787	63.1041	531.65	1	1	1	128	69	4	0	0	0	0	2	1	0.83	11	4.4	0.11	0.78	0
116	1	1	1	0	1	1	1	115.84	70-79	20.16	1.47688	78.4357	78.44	1	1	1	136	85	4	0	0	0	0	2	1	0.94	11.4	4.1	0.03	1.25	0
116	2	1	1	0	1	1	1	173.76	70-79	19.88	1.468	39.455	117.89	1	1	1	128	82	4	0	0	0	0	2	1	1.2	12.1	4.5	0.11	1.19	0
116	3	1	1	0	1	1	1	269.38	70-79	18.15	1.40651	67.9838	185.87	1	2	1	106	57	1	0	0	0	0	3	1	0.93	10.8	4.3	0.18	1.09	0
116	4	1	1	0	1	1	1	345.48	70-79	18.06	1.40382	54.2092	240.08	1	1	1	123	96	3	0	0	0	0	2	1	1	10.9	4.1	0.05	0.98	0
116	5	1	1	0	1	1	1	434.06	70-79	18.28	1.42245	62.2701	302.35	1	1	1	130	75	4	0	0	0	0	3	1	0.9	11.1	4.2	0.08	1.06	0
117	1	3	1	1	0	0	1	65	80-89	19.68	1.53575	42.3247	42.32	1	2	0	92	57	1	1	0	0	1	1	1	0.89	11.8	3	0.28	1.21	0
117	2	3	1	1	0	0	1	130	80-89	18.98	1.51212	42.9859	85.31	1	1	1	85	51	1	1	0	0	1	2	1	1.16	11	3.1	0.27	1.69	0
118	1	1	1	1	0	0	0	124.32	50-59	21.23	1.8284	67.99	67.99	1	1	1	102	56	1	0	0	0	0	2	1	0.77	14.9	3.5	2.86	1.11	0
118	2	1	1	1	0	0	0	245.49	50-59	19.98	1.78161	68.01	136.01	1	1	1	126	72	3	0	0	0	0	2	1	0.81	14.4	3.8	0.7	1.06	0
118	3	1	1	1	0	0	0	381.01	50-59	19.64	1.76889	76.61	212.62	1	1	1	119	86	3	0	0	0	0	2	1	0.82	13.3	4	0.32	1.03	0
118	4	1	1	1	0	0	0	518.29	50-59	19.85	1.77218	77.46	290.08	1	1	1	103	66	1	0	0	0	0	2	1	0.92	13.1	3.8	0.11	0.94	0
118	5	1	1	1	0	0	0	655.89	50-59	20.68	1.80329	76.3	366.39	1	1	1	125	83	3	0	0	0	0	2	1	0.98	13.7	4.1	0.08	1.27	0
118	6	1	1	1	0	0	0	755.89	50-59	21.26	1.81145	55.2	421.59	1	1	1	126	87	3	0	0	0	0	2	1	1.27	12.9	3.9	0.21	1.07	0
119	1	2	1	1	0	0	0	116.32	60-69	18.42	1.49458	77.828	77.83	0	1	1	106	70	1	0	0	0	0	1	1	0.82	14.2	4.7	0.02	0.76	0
120	1	1	0	0	1	0	1	66	80-89	17.65	1.25836	52.449	52.45	1	2	0	126	68	3	1	0	1	0	2	1	1.15	8.7	2.8	2.4	1.52	0
121	1	2	0	0	0	0	0	110	60-69	22.67	1.37711	79.8773	79.88	0	1	1	111	58	2	0	0	0	0	2	1	0.38	12	4	1.88	0.37	0
121	2	2	0	0	0	0	0	216.64	60-69	22.11	1.36237	78.2751	158.15	0	2	1	118	63	3	0	0	0	0	2	1	0.38	11.4	4	0.19	0.36	0
122	1	1	1	1	0	0	0	133.76	50-59	21.54	1.6945	78.9376	78.94	1	2	1	97	53	1	0	0	0	0	2	1	0.5	8.9	2.7	8.66	0.57	0
122	2	1	1	1	0	0	0	267.52	50-59	21.89	1.70625	78.3939	157.33	1	2	1	123	60	3	0	0	0	0	2	1	0.56	9.3	3.1	1.22	0.7	0
122	3	1	1	1	0	0	0	384.56	50-59	22.13	1.70607	68.6019	225.93	1	1	1	122	72	3	0	0	0	0	2	1	0.58	9.1	3.1	4.54	0.82	0
122	4	1	1	1	0	0	0	502.72	50-59	21.49	1.68495	70.1268	296.06	1	1	1	127	82	3	0	0	0	0	2	1	0.61	8.6	2.8	4.23	0.8	0
123	1	2	1	1	1	0	0	142.64	70-79	23.51	1.82521	78.1501	78.15	0	1	1	150	84	4	0	0	0	0	2	1	0.67	12.3	3.8	0.11	1.6	1
124	1	1	1	1	1	0	0	115.78	60-69	20.52	1.70217	68.0191	68.02	1	2	1	141	98	4	0	0	0	0	2	1	0.75	15.4	4.5	0.04	1.04	0
124	2	1	1	1	1	0	0	231.56	60-69	19.66	1.67166	69.2606	137.28	1	2	1	110	72	2	0	0	0	0	2	1	0.96	13.8	4	0.32	1.04	0
124	3	1	1	1	1	0	0	362.6	60-69	20.07	1.6864	77.7041	214.98	1	2	1	128	93	4	0	0	0	0	2	1	0.93	11	3.6	0.08	1.07	0
124	4	1	1	1	1	0	0	468.2	60-69	20.2	1.69851	62.1723	277.16	1	2	1	155	95	4	0	0	0	0	2	1	1.18	11	3.9	0.69	1.24	0
125	1	2	0	0	0	0	0	128.24	30-39	21.8	1.651	77.6743	77.67	1	1	0	131	83	4	0	0	0	0	2	1	0.52	11.9	4.3	0.07	0.7	0
125	2	2	0	0	0	0	0	256.88	30-39	22.2	1.65106	77.9134	155.59	0	1	1	126	96	3	0	0	0	0	2	1	0.49	12.1	4	0.07	0.71	0
126	1	3	0	0	0	0	0	90	60-69	22.41	1.52619	58.9706	58.9706	1	1	1	107	72	2	0	0	0	0	1	1	0.65	11.9	4.1	0.26	0.77	0
126	2	3	0	0	0	0	0	180	60-69	23.15	1.52697	58.9402	117.911	1	1	1	106	64	1	0	0	0	0	1	1	0.74	11.3	4.8	0.05	0.75	0
126	3	3	0	0	0	0	0	270	60-69	22.99	1.53186	58.7522	176.663	1	1	1	101	67	1	0	0	0	0	1	1	0.7	10.6	4.7	0.04	0.73	0
126	4	3	0	0	0	0	0	345	60-69	23.3	1.53427	48.8833	225.546	1	1	1	114	78	2	0	0	0	0	2	1	0.77	10.6	4.5	0.29	0.75	0
126	5	3	0	0	0	0	0	445	60-69	23.61	1.54301	64.8086	290.355	1	1	1	110	80	2	0	0	0	0	2	1	0.74	10.1	4.3	0.07	0.77	0
126	6	3	0	0	0	0	0	520	60-69	24.24	1.55711	48.1663	338.521	1	1	1	94	58	1	0	0	0	0	2	1	0.77	10	4.6	0.14	0.83	0
126	7	3	0	0	0	0	0	595	60-69	22.58	1.52323	49.2376	387.759	1	1	1	118	68	3	0	0	0	0	3	1	0.69	9.9	4.4	0.13	0.85	0
127	1	3	1	0	1	1	0	111.79	60-69	22.63	1.62655	68.7282	68.7282	1	1	1	152	96	4	0	0	0	0	2	1	0.6	7.6	3.1	1.03	0.83	0
127	2	3	1	0	1	1	0	221.79	60-69	21.17	1.57167	69.9894	138.718	1	1	1	138	70	4	0	0	0	0	2	1	0.69	8.4	3.8	0.08	0.78	0
127	3	3	1	0	1	1	0	312.11	60-69	20.67	1.56033	57.8858	196.603	1	1	1	111	63	2	0	0	0	0	0	0	0.58	8.1	3.6	0.36	0.69	0
127	4	3	1	0	1	1	0	402.43	60-69	20.95	1.55717	58.0032	254.607	1	2	0	126	88	3	0	0	0	0	2	1	0.6	8.3	4	0.1	0.77	0
127	5	3	1	0	1	1	0	492.43	60-69	20.98	1.54736	58.1634	312.77	1	1	0	134	87	4	0	0	0	0	2	1	0.57	6.7	4	0.07	0.82	0
127	6	3	1	0	1	1	0	582.43	60-69	20.74	1.55042	58.0486	370.819	1	1	1	126	85	3	0	0	0	0	2	1	0.56	7.7	4	0.06	0.74	0
128	1	2	1	1	1	0	0	105.92	70-79	21.13	1.3568	78.0658	78.07	0	1	1	106	63	1	1	1	1	0	2	1	0.47	12.4	4.2	0.07	0.77	1
129	1	1	0	0	0	0	0	83.26	80-89	18.26	1.33846	62.2087	62.21	1	1	1	101	56	1	0	0	0	0	2	1	0.46	9.6	3	2.01	0.86	1
130	1	1	0	0	1	0	0	83.96	70-79	25.11	1.50887	55.6441	55.64	1	1	1	123	71	3	1	1	1	0	2	1	0.71	11.6	4.1	0.02	0.81	0
130	2	1	0	0	1	0	1	167.92	70-79	24.27	1.4871	56.459	112.1	1	2	1	106	63	1	1	1	1	0	2	1	0.73	11.3	3.9	0.03	0.74	0
131	1	2	1	1	0	0	0	114.25	40-49	18.97	1.47521	77.7651	77.77	0	1	1	101	70	1	1	0	0	1	2	1	0.42	11.6	4	0.06	0.46	0
131	2	2	1	1	0	0	0	228	40-49	18.77	1.46869	77.1297	154.89	0	1	1	101	74	1	1	0	0	1	2	1	0.46	11.8	4.2	0.1	0.55	0
131	3	2	1	1	0	0	0	341.76	40-49	18.95	1.47456	77.1484	232.04	0	1	1	99	54	1	0	0	0	0	2	1	0.48	12.1	4.2	0.09	0.48	0
132	1	1	1	1	0	0	0	99.68	40-49	16.28	1.44462	69.0007	69	1	2	1	102	70	1	0	0	0	0	2	1	0.67	11.7	3.9	0.11	0.91	0
132	2	1	1	1	0	0	0	197.61	40-49	15.11	1.39952	71.4031	140.4	1	2	1	92	66	1	0	0	0	0	2	1	0.84	11.2	3.7	1.17	1.01	0
133	1	2	1	1	0	0	0	158.3	50-59	20.12	1.62609	97.35	97.35	1	1	1	109	69	2	0	0	0	0	0	0	0.65	14.4	3.6	0.25	1.05	1
133	2	2	1	1	0	0	0	313.5	50-59	19.22	1.59489	97.31	194.66	1	1	1	112	72	2	0	0	0	0	0	0	0.71	12.1	3.7	0.29	1.13	1
133	3	2	1	1	0	0	0	429.36	50-59	19.22	1.59489	72.64	267.31	1	1	1	114	71	2	0	0	0	0	0	0	0.86	10.2	3.6	0.12	1.06	0
134	1	1	1	1	0	0	0	119.04	70-79	16.3	1.52656	77.9795	77.98	1	2	0	121	72	3	0	0	0	0	2	1	0.7	13.7	3.9	2.93	0.94	0
134	2	1	1	1	0	0	1	202.04	70-79	16.34	1.52794	54.3217	132.3	1	2	0	95	60	1	0	0	0	0	2	1	0.94	12.2	3.5	0.21	0.92	0
135	1	2	0	1	0	0	0	71	60-69	21.28	1.44944	48.98	48.98	1	2	1	141	71	4	0	0	0	0	0	0	0.36	12.2	3.4	0.6	0.56	1
135	2	2	0	1	0	0	0	143	60-69	20.4	1.42374	49.87	98.85	1	1	1	120	76	3	0	0	0	0	0	0	0.42	11.5	4.1	0.14	0.64	1
135	3	2	0	1	0	0	0	211	60-69	19.38	1.39285	49.54	148.39	1	1	1	126	78	3	0	0	0	0	0	0	0.52	9.6	3.7	3.9	0.61	0
136	1	1	0	1	1	0	0	104.64	70-79	24.05	1.6804	62.2707	62.27	1	1	1	145	70	4	1	1	0	0	2	1	0.73	14.6	4.2	0.22	1.06	0
137	1	3	1	1	1	0	0	100	60-69	22.95	1.71333	58.366	58.37	1	1	1	128	68	4	1	1	0	1	2	1	0.79	9.8	4.1	0.01	1.18	0
138	1	2	1	1	0	0	0	127.6	40-49	17.51	1.64725	77.4625	77.4625	0	2	1	121	65	3	0	0	0	0	2	1	0.63	12.3	3.9	5.03	0.91	0
138	2	2	1	1	0	0	0	255.2	40-49	16.75	1.62952	78.3053	155.768	0	2	0	122	83	3	0	0	0	0	2	1	0.79	11.9	4.4	0.69	0.93	0
138	3	2	1	1	0	0	0	378.4	40-49	16.11	1.593	77.3383	233.106	0	2	1	94	60	1	0	0	0	0	2	1	0.71	11.7	3.7	1.58	0.89	0
139	1	2	1	1	1	0	0	117.44	60-69	19.99	1.51764	77.3831	77.38	1	1	1	116	69	2	1	1	1	0	2	1	0.73	15.7	4.4	0.12	0.8	0
139	2	2	1	1	1	0	0	232.8	60-69	18.38	1.48003	77.9445	155.33	1	2	1	105	57	1	1	1	1	0	2	1	0.82	12.9	4.2	0.05	0.66	0
139	3	2	1	1	1	0	0	348.08	60-69	17.59	1.45268	79.3567	234.68	1	2	1	107	68	2	1	1	1	0	2	1	0.64	12	3.9	0.39	0.66	0
139	4	2	1	1	1	0	0	463.36	60-69	17.03	1.43291	80.4516	315.14	1	2	0	112	73	2	1	1	1	0	2	1	0.6	10.6	3.9	0.93	0.6	0
140	1	2	1	1	1	0	0	89.1	70-79	20.51	1.53257	58.1375	58.14	1	1	1	113	71	2	1	1	0	0	2	1	0.74	12.9	3.9	0.05	0.78	0
140	2	2	1	1	1	0	0	178.62	70-79	20.66	1.53752	58.2235	116.36	1	2	1	108	66	2	1	1	0	0	2	1	0.69	11.5	3.5	0.14	0.74	0
140	3	2	1	1	1	0	0	273.66	70-79	20.1	1.53451	61.9349	178.3	1	2	1	100	85	1	1	1	0	0	2	1	0.74	11.2	3.7	0.04	1.12	1
140	4	2	1	1	1	0	0	369.21	70-79	20.06	1.53326	62.3194	240.62	1	1	1	116	64	2	1	1	0	0	2	1	1.01	9.2	3.7	0.12	0.97	0
141	1	2	1	1	1	0	0	134.08	60-69	23.29	1.71905	77.9964	77.9964	0	2	1	152	95	4	0	0	0	0	2	1	0.73	16.5	4.1	0.64	0.93	0
141	2	2	1	1	1	0	0	268.16	60-69	22.56	1.69616	79.0492	157.046	0	2	1	132	93	4	0	0	0	0	2	1	0.85	15.1	4.2	0.13	0.92	0
142	1	1	1	1	1	0	0	81.31	60-69	14.99	1.50333	54.0866	54.09	1	2	0	124	52	3	0	0	0	0	2	1	1.04	13.4	3.2	2.64	1.64	1
142	2	1	1	1	1	0	0	106.31	60-69	15.14	1.50979	16.5586	70.65	1	1	1	112	70	2	0	0	0	0	2	1	1.56	11.6	3	3.57	1.68	0
143	1	1	1	1	0	0	0	142.48	60-69	22.37	1.83121	77.8066	77.81	1	1	1	134	77	4	0	0	0	0	2	1	0.57	13.7	4.4		0.87	1
143	2	1	1	1	0	0	0	279.28	60-69	21.06	1.78497	76.6398	154.45	1	1	1	115	77	2	0	0	0	0	2	1	0.7	11.4	3.7	0.19	0.74	0
144	1	1	1	1	1	0	0	97.6	80-89	20.34	1.56811	62.2406	62.24	1	1	1	120	58	3	1	0	0	1	2	1	0.83	13.9	3.9	0.48	1.1	0
145	1	1	1	1	1	0	0	100	60-69	20.23	1.72325	58.03	58.03	1	1	1	100	74	1	1	0	1	1	2	1	1.56	12.3	4.2	0.55	1.42	0
145	2	1	1	1	1	0	0	200	60-69	20	1.71475	58.32	116.35	1	1	1	127	82	3	0	0	0	0	2	1	1.42	11.7	4.5	0.47	1.47	0
146	1	3	0	0	0	0	0	84	60-69	19.17	1.3738	61.1441	61.14	1	1	1	114	67	2	0	0	0	0	0	0	0.51	10.7	4.1	0.74	0.69	0
146	2	3	0	0	0	0	0	164	60-69	18.62	1.34268	59.5823	120.73	1	1	1	99	61	1	0	0	0	0	2	1	0.61	10.3	3.9	0.11	0.7	0
146	3	3	0	0	0	0	0	244	60-69	18.08	1.33302	60.0142	180.74	1	1	1	97	68	1	0	0	0	0	2	1	0.6	10.5	3.4	0.36	0.71	0
146	4	3	0	0	0	0	0	319	60-69	17.21	1.30533	57.4569	238.2	1	1	0	99	66	1	0	0	0	0	2	1	0.71	10	3.4	1.72	0.75	0
147	1	3	0	0	0	0	0	78.48	50-59	19.2	1.35475	57.9295	57.9295	1	1	1	98	60	1	0	0	0	0	0	0	0.4	8.2	4.1	0.01	0.49	0
147	2	3	0	0	0	0	0	158.48	50-59	19.03	1.34682	59.3992	117.329	1	1	1	105	59	1	0	0	0	0	2	1	0.43	10.1	4.3	0.02	0.47	0
147	3	3	0	0	0	0	0	238.48	50-59	19.76	1.36852	58.4572	175.786	1	2	1	104	74	1	0	0	0	0	2	1	0.51	10.5	4.2	0.01	0.5	0
148	1	2	1	1	0	0	0	124.65	60-69	21.56	1.70802	72.9794	72.9794	1	1	1	143	61	4	0	0	0	0	2	1	0.71	15.2	4.5	0.04	0.84	0
148	2	2	1	1	0	0	0	249.3	60-69	22.21	1.72961	72.0681	145.047	1	1	1	137	79	4	0	0	0	0	3	1	0.77	13.7	3.7	0.04	0.9	0
149	1	2	0	0	0	0	0	117.04	40-49	23.67	1.49943	78.0563	78.06	0	1	1	100	63	1	0	0	0	0	2	1	0.54	13.1	4.1	0.02	0.66	0
149	2	2	0	0	0	0	0	234.08	40-49	23.39	1.49181	78.455	156.51	0	1	1	120	73	3	0	0	0	0	2	1	0.51	11.7	4	0.05	0.6	0
150	1	2	1	1	0	0	0	123.92	60-69	17.51	1.59855	77.5203	77.52	0	1	1	102	48	1	0	0	0	0	2	1	0.79	13	4.4	0.07	0.8	0
150	2	2	1	1	0	0	0	246.4	60-69	17.07	1.58127	77.4566	154.98	0	1	1	92	42	1	0	0	0	0	2	1	0.74	12.3	4.3	0.02	0.78	0
151	1	1	1	1	1	0	0	87.42	70-79	17.12	1.40834	62.0758	62.08	1	1	1	104	61	1	1	1	0	0	2	1	0.61	13.3	3.9	0.18	0.72	0
151	2	1	1	1	1	0	0	196.7	70-79	16.81	1.39725	78.2108	140.29	1	2	0	110	50	2	1	1	0	0	2	1	0.71	12.9	3.7	0.06	0.82	0
151	3	1	1	1	1	0	0	305.98	70-79	16.49	1.38604	78.8435	219.13	1	2	1	95	52	1	1	1	0	0	2	1	0.82	11.4	3.5	3.67	0.84	0
152	1	2	0	0	0	0	0	123.5	70-79	19.19	1.24844	98.92	98.92	1	2	1	115	76	2	0	0	0	0	0	0	0.65	12.3	3.9	0.15	0.78	0
152	2	2	0	0	0	0	0	201.58	70-79	18.88	1.23961	62.99	161.91	0	1	1	108	60	2	0	0	0	0	2	1	0.65	10.4	4.1	0.05	1.07	1
153	1	2	0	0	0	0	0	142.88	20-29	22.63	1.82361	78.3499	78.35	0	1	1	134	86	4	0	0	0	0	2	1	0.7	14.5	4.5	0.04	0.88	0
153	2	2	0	0	0	0	0	285.76	20-29	21.54	1.78575	80.0114	158.36	0	1	0	131	86	4	0	0	0	0	2	1	0.83	14	4.1	2.42	0.79	0
154	1	2	1	1	1	0	0	129.2	50-59	22.79	1.65044	78.282	78.28	1	1	1	152	102	4	1	1	1	0	2	1	0.49	13.1	4.6	0.09	0.61	0
155	1	2	1	1	0	0	0	116.56	60-69	16	1.506	77.3972	77.4	0	2	1	105	62	1	0	0	0	0	2	1	0.7	10.9	3.7	1.83	0.89	0
155	2	2	1	1	0	0	0	236.24	60-69	16.73	1.53497	77.9691	155.37	0	2	1	126	59	3	0	0	0	0	2	1	0.81	10	3.8	0.53	0.75	0
155	3	2	1	1	0	0	0	355.92	60-69	16.96	1.54379	77.5237	232.89	0	2	1	118	51	3	0	0	0	0	2	1	0.69	9.6	3.5	0.2	1.05	1
156	1	3	0	1	0	0	0	106.05	70-79	19.58	1.5234	69.6141	69.6141	1	1	1	124	79	3	0	0	0	0	2	1	0.67	13.1	3.7	0.07	0.82	0
156	2	3	0	1	0	0	0	209.72	70-79	20.28	1.54796	66.972	136.586	1	1	1	126	70	3	0	0	0	0	2	1	0.7	11.6	3.3	0.02	0.77	0
156	3	3	0	1	0	0	0	313.46	70-79	19.89	1.53809	67.4472	204.033	1	1	1	141	91	4	0	0	0	0	2	1	0.75	10.5	3.7	0.1	0.77	0
157	1	3	1	0	0	0	0	20	70-79	18.77	1.16929	17.1044	17.1044	1	2	0	118	94	3	0	0	0	0	0	0	0.82	9	2.6	5.21	0.82	0
157	2	3	1	0	0	0	0	47.36	70-79	18.77	1.16929	23.3989	40.5033	1	2	0	118	65	3	0	0	0	0	0	0	0.81	8.4	2.8	1.29	0.82	0
158	1	3	0	0	0	1	0	75	70-79	18.76	1.3612	55.0983	55.1	1	1	1	117	62	2	0	0	0	0	3	1	0.64	9.8	4.1	0.02	0.75	0
158	2	3	0	0	0	1	0	153.6	70-79	18.29	1.34642	58.3772	113.48	1	1	1	106	56	1	0	0	0	0	3	1	0.65	8.5	4.2	0.01	0.76	0
158	3	3	0	0	0	1	0	232.2	70-79	18.04	1.32901	59.1418	172.62	1	1	1	96	50	1	0	0	0	0	3	1	0.71	8.4	4	0.01	0.69	0
159	1	1	1	1	0	0	0	81	70-79	16.45	1.38463	58.4995	58.5	1	1	1	114	65	2	0	0	0	0	2	1	0.6	10.9	3.8	0.24	0.88	0
159	2	1	1	1	0	0	0	156.2	70-79	14.63	1.31722	57.849	116.35	1	1	1	105	84	1	0		0	0	2	1	0.67	10.2	3.5	0.04	0.63	0
160	1	2	1	0	1	1	1	141.52	70-79	31.32	1.79348	78.9078	78.91	1	1	1	127	61	3	1	0	1	0	2	1	0.86	13.1	4.4	0.12	1.14	0
160	2	2	1	0	1	1	1	283.04	70-79	30.48	1.77278	79.8296	158.74	1	1	1	142	79	4	1	0	1	0	2	1	0.98	11.4	4.2	0.6	1.36	0
161	1	1	1	1	0	0	0	119.04	70-79	20.03	1.52937	77.8357	77.84	1	2	0	94	64	1	0	0	0	0	3	1	0.65	9.2	3.1	2.67	4.8	1
162	1	1	0	1	0	0	0	121.6	60-69	19.42	1.56434	77.7327	77.73	1	2	1	101	60	1	0	0	0	0	2	1	0.68	12.5	3.1	1.13	1.04	1
162	2	1	0	1	0	0	0	242.4	60-69	19.5	1.55962	77.4546	155.19	1	1	0	136	78	4	0	0	0	0	2	1	0.89	11.7	3.5	0.38	1.3	0
163	1	2	0	0	1	0	0	140.5	70-79	20.2599	1.45325	96.6797	96.6797	1	1	1	128	73	4	1	1	0	0	0	0	0.46	11.5	3.8	0.05	0.63	0
163	2	2	0	0	1	0	0	290.5	70-79	20.1146	1.44881	103.533	200.213	1	2	1	126	58	3	1	1	0	0	0	0	0.51	11	4.1	0.04	0.65	0
164	1	1	0	1	0	0	0	130	60-69	23.92	1.66052	78.2886	78.29	1	1	1	144	80	4	0	0	0	0	2	1	0.69	14.8	4.2	0.11	1.48	1
164	2	1	0	1	0	0	0	260	60-69	23.39	1.64459	79.0473	157.34	1	1	1	115	78	2	0	0	0	0	2	1	1.09	14.4	4.1	0.15	1.39	0
165	1	3	1	1	0	0	0	116	60-69	17.17	1.46774	79.0331	79.03	1	1	1	118	75	3	0	0	0	0	2	1	0.95	11.5	3.5	0.12	1.35	0
165	2	3	1	1	0	0	0	232	60-69	18.4	1.50848	76.8985	155.93	1	1	1	125	70	3	0	0	0	0	2	1	0.97	10.4	4.1	0.02	1.21	0
165	3	3	1	1	0	0	0	321	60-69	19.1	1.53706	57.9027	213.83	1	1	1	148	88	4	0	0	0	0	2	1	1.05	9.5	4.1	0.02	1.32	0
165	4	3	1	1	0	0	0	410	60-69	19.97	1.56025	57.0422	270.88	1	1	1	141	81	4	0	0	0	0	2	1	1.09	9.1	4.4	0.01	1.44	0
166	1	2	1	1	0	0	0	107.12	70-79	17.73	1.37043	78.1654	78.17	0	2	1	138	87	4	0	0	0	0	2	1	0.72	9.9	3.4	0.18	0.73	0
166	2	2	1	1	0	0	0	214.24	70-79	17.21	1.35319	79.1611	157.33	0	2	1	116	65	2	0	0	0	0	2	1	0.73	10	3.8	0.1	0.74	0
167	1	2	1	0	0	0	0	138	60-69	22.13	1.7724	77.8605	77.86	0	1	1	127	75	3	0	0	0	0	2	1	0.62	12.9	3.7	0.42	0.92	0
168	1	1	1	1	1	0	0	116.64	60-69	20.26	1.49768	77.8804	77.8804	1	2	1	140	83	4	0	0	0	0	2	1	0.66	12.9	3.5	1.1	0.82	0
168	2	1	1	1	1	0	0	230.64	60-69	19.36	1.46906	77.6004	155.481	1	1	1	136	92	4	0	0	0	0	2	1	0.77	11.7	3.7	0.24	0.66	0
169	1	1	1	0	0	0	0	112.77	50-59	20.94	1.64954	68.3647	68.36	1	2	1	110	70	2	0	0	0	0	2	1	0.83	15	4	0.04	0.76	0
169	2	1	1	0	0	0	0	225.54	50-59	20.3	1.62766	69.2836	137.65	1	2	1	129	84	4	0	0	0	0	2	1	0.75	14.8	4.2	0.07	0.79	0
170	1	2	1	1	0	0	0	122.03	60-69	20.15	1.67508	72.8472	72.8472	1	1	1	106	57	1	0	0	0	0	2	1	0.57	12.4	3.5	0.81	0.6	0
170	2	2	1	1	0	0	0	243	60-69	19.98	1.66896	72.4852	145.332	1	1	1	121	71	3	0	0	0	0	2	1	0.57	12.6	3.9	0.15	0.64	0
171	1	1	1	1	1	0	0	120	60-69	20.24	1.57222	76.3251	76.33	1	2	0	86	67	1	1	0	1	1	2	1	1.06	14.4	4	1.03	2.13	1
172	1	3	0	0	0	0	0	84	60-69	19.64	1.43868	58.3867	58.3867	1	2	0	150	85	4	0	0	0	0	1	1	0.43	9.7	3.1	1.03	0.45	0
172	2	3	0	0	0	0	0	169	60-69	19.34	1.4349	59.2376	117.624	1	1	0	131	70	4	0	0	0	0	1	1	0.39	11	3.6	0.04	0.53	0
173	1	1	1	1	0	0	0	130.7	60-69	21.07	1.68038	77.7799	77.78	1	2	1	122	79	3	0	0	0	0	2	1	0.62	13.4	4.6	0.12	0.86	0
174	1	2	1	1	0	0	0	131.04	60-69	22.64	1.6811	77.9489	77.95	0	1	1	140	81	4	0	0	0	0	2	1	0.59	14	4.3	0.08	0.6	0
175	1	2	0	1	1	0	0	93.57	70-79	20.59	1.50961	61.9814	61.98	1	1	1	113	66	2	1	1	1	0	2	1	0.74	12	3.7	0.02	1.28	1
176	1	3	0	0	0	0	0	90	60-69	21.9	1.55123	58.0186	58.0186	1	1	1	119	68	3	0	0	0	0	2	1	0.37	9.9	3.2	1.1	0.49	0
177	1	2	1	0	1	0	0	131.12	70-79	19.36	1.66837	78.5916	78.59	0	1	1	109	58	2	1	0	1	0	2	1	0.87	13.3	4.1	0.95	1.17	0
178	1	2	1	0	0	0	0	128.18	50-59	23.24	1.74862	73.3006	73.3006	1	1	1	150	90	4	0	0	0	0	2	1	0.56	15.4	4.6	0.1	0.83	0
179	1	1	1	1	1	0	1	110	70-79	21.7	1.59308	69.0485	69.05	1	1	1	106	85	1	0	0	0	0	2	1	0.85	14	3.9	0.19	1.06	0
180	1	1	1	1	0	0	0	74	70-79	17.63	1.367	54.133	54.133	1	1	1	102	66	1	0	0	0	0	2	1	0.74	12.2	4.5	0.02	0.8	0
181	1	3	1	1	0	0	0	95	60-69	19.82	1.63129	58.2362	58.2362	1	1	1	119	71	3	0	0	0	0	2	1	0.64	13	3.6	0.73	0.81	0
182	1	1	1	0	1	0	1	49.8	60-69	32.93	1.68782	29.5055	29.51	1	1	1	137	70	4	1	1	1	0	0	0	0.91	10.9	4.4	0.09	1.12	0
